# Supplementary material
Source: publisher figshare collection journal article supplement (https://rs.figshare.com/ndownloader/files/11484059)

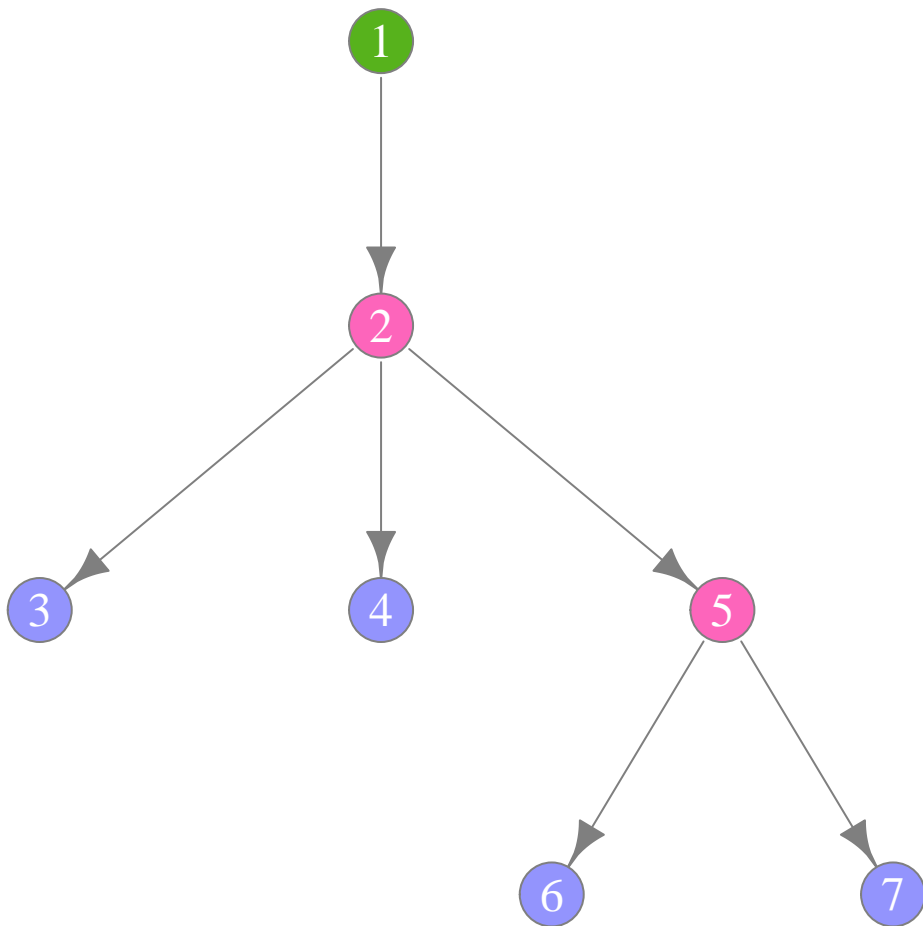

Supplement: Supplementary file 4 [file 11484059]

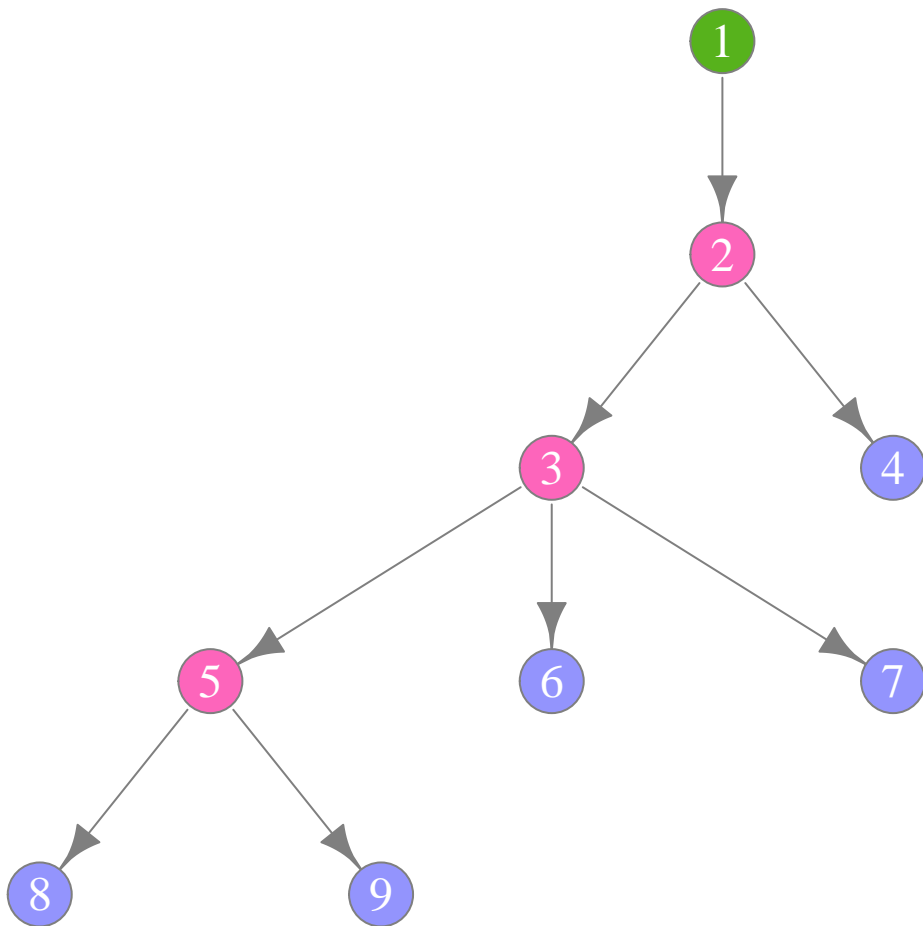

Supplement: Supplementary file 5 [file 11484059]

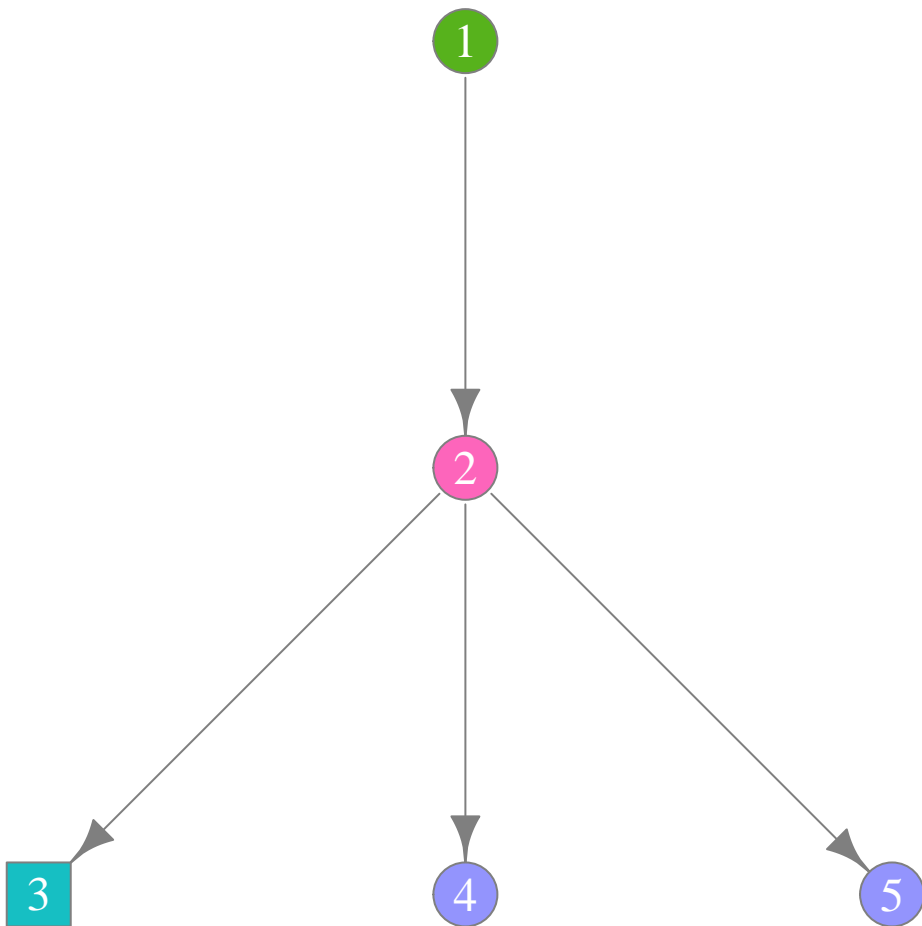

Supplement: Supplementary file 8 [file 11484059]

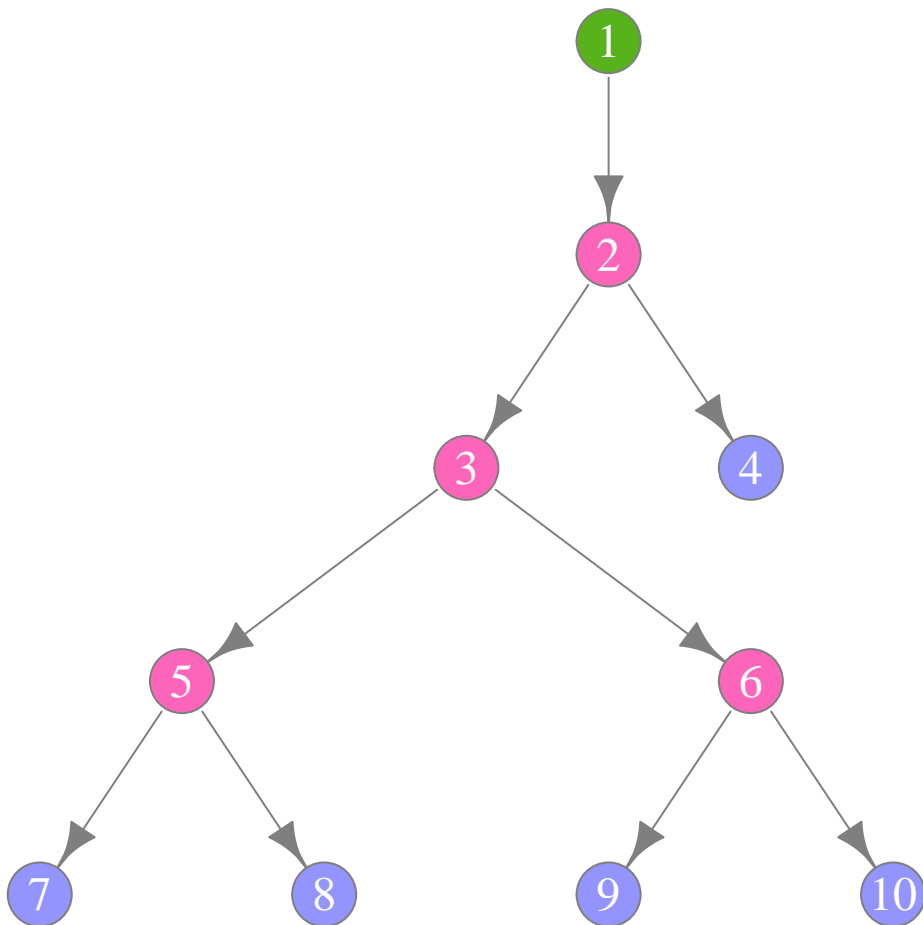

Supplement: Supplementary file 10 [file 11484059]

1

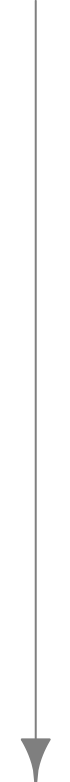

2

Supplement: Supplementary file 11 [file 11484059]

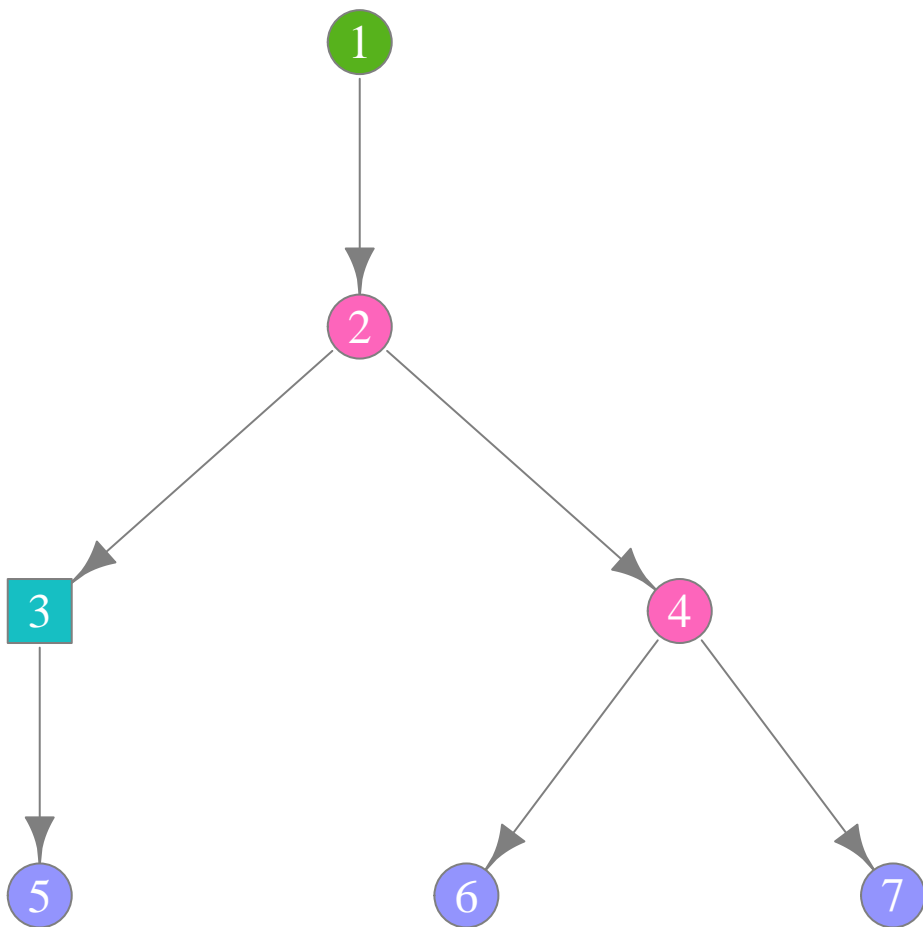

Supplement: Supplementary file 13 [file 11484059]

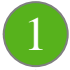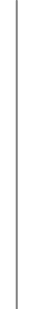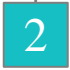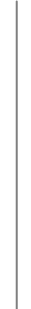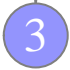

Supplement: Supplementary file 14 [file 11484059]

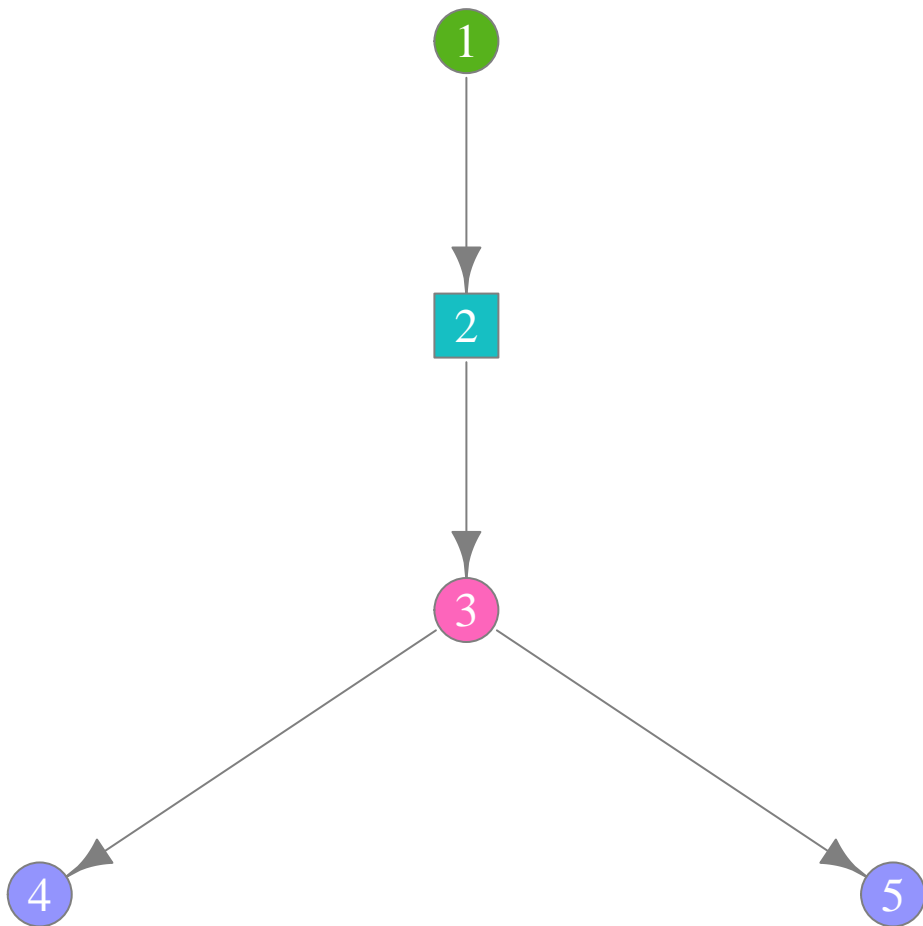

Supplement: Supplementary file 15 [file 11484059]

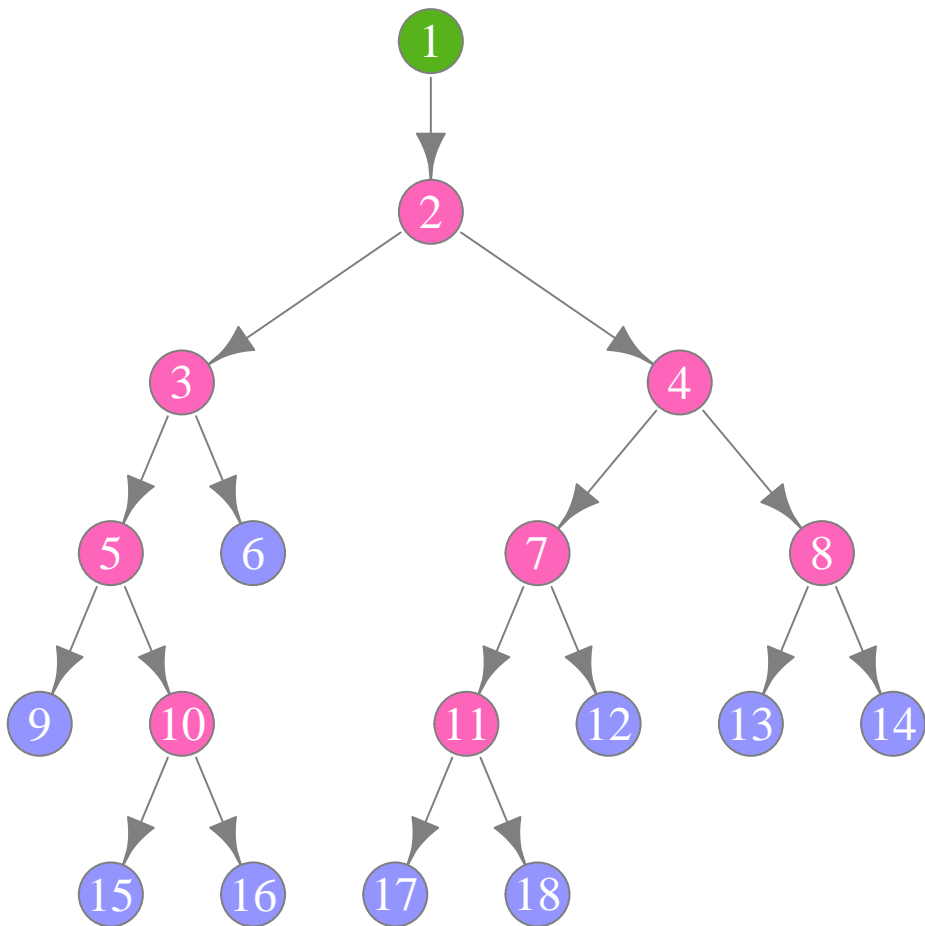

Supplement: Supplementary file 16 [file 11484059]

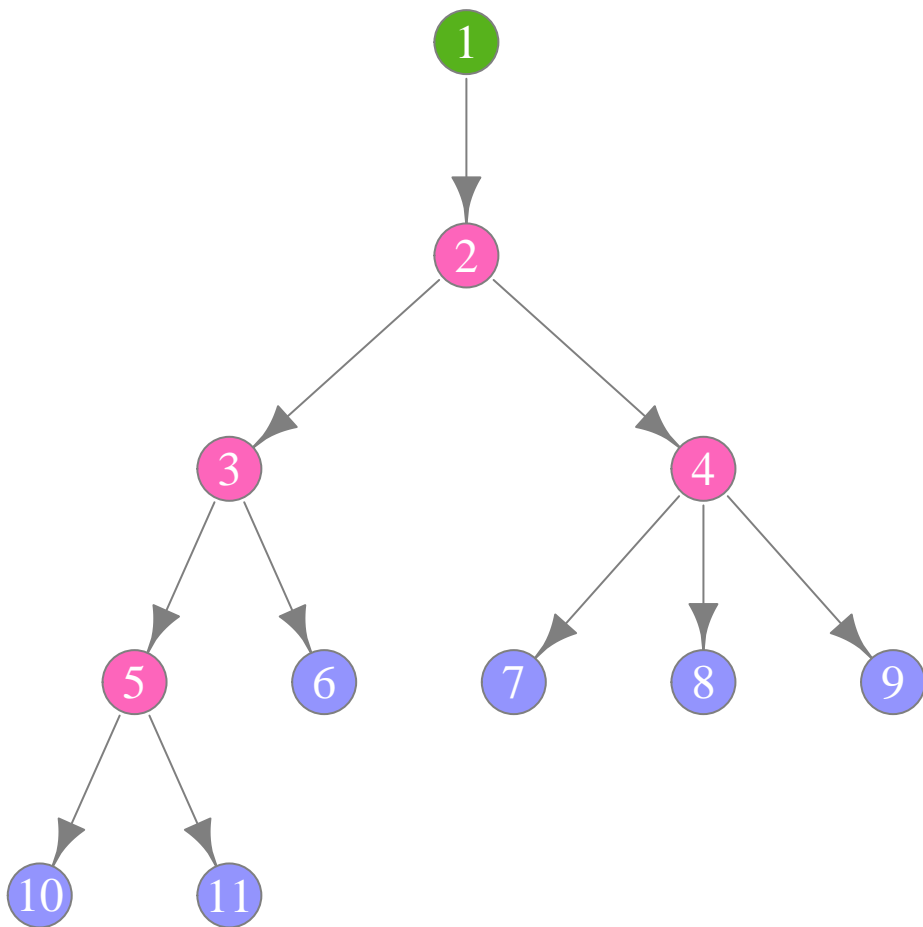

Supplement: Supplementary file 17 [file 11484059]

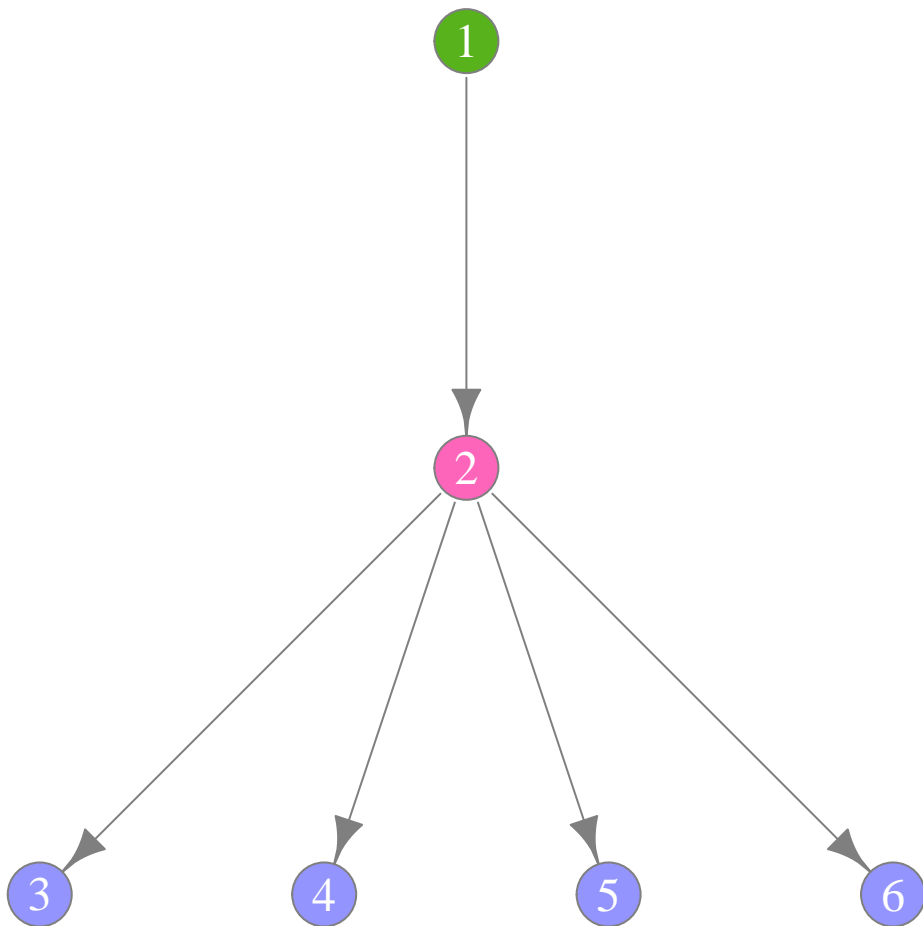

Supplement: Supplementary file 19 [file 11484059]

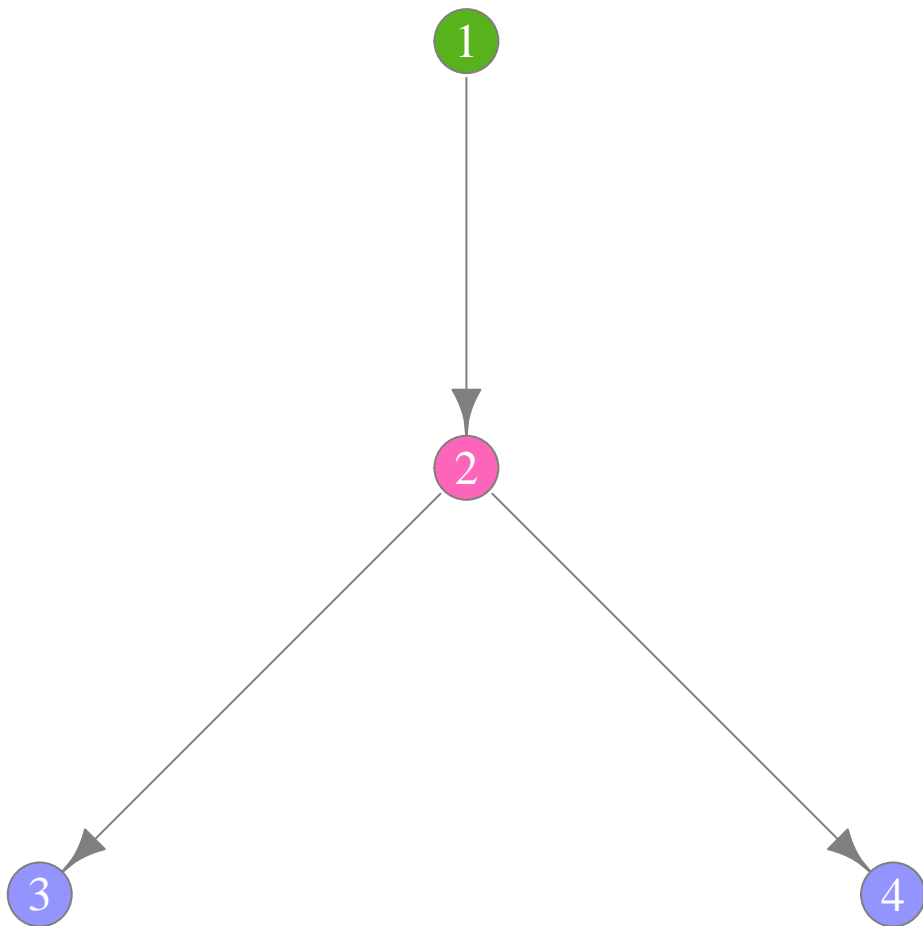

Supplement: Supplementary file 20 [file 11484059]

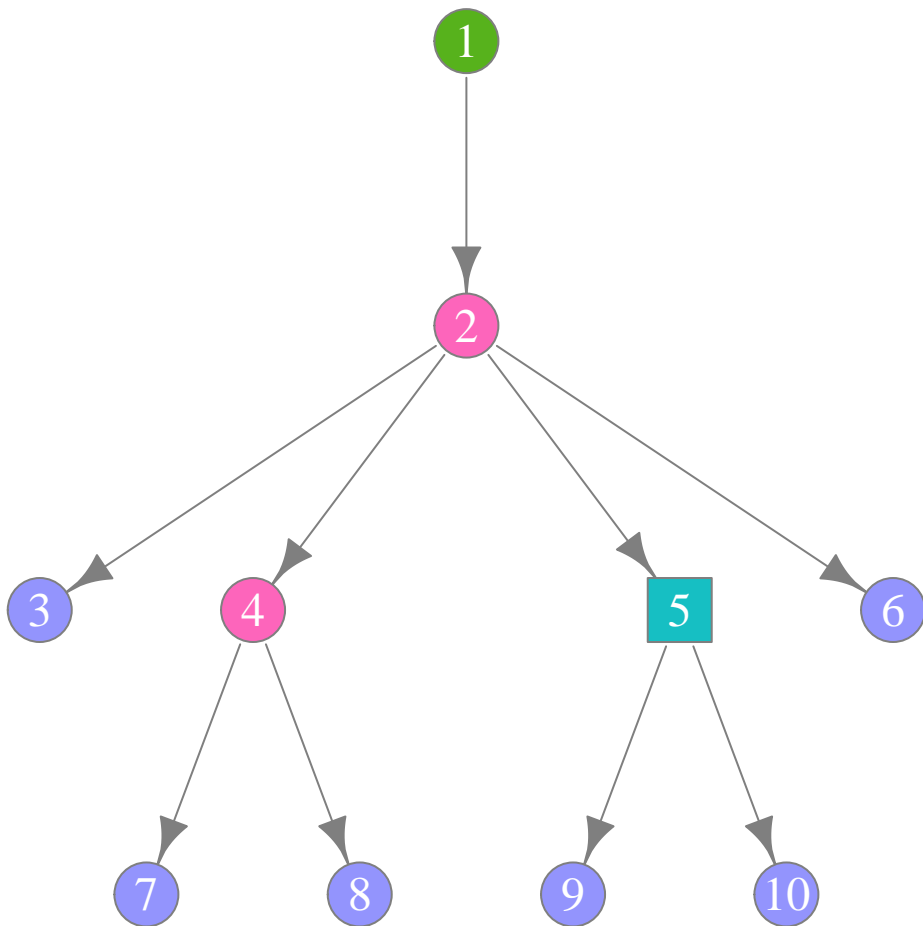

Supplement: Supplementary file 21 [file 11484059]

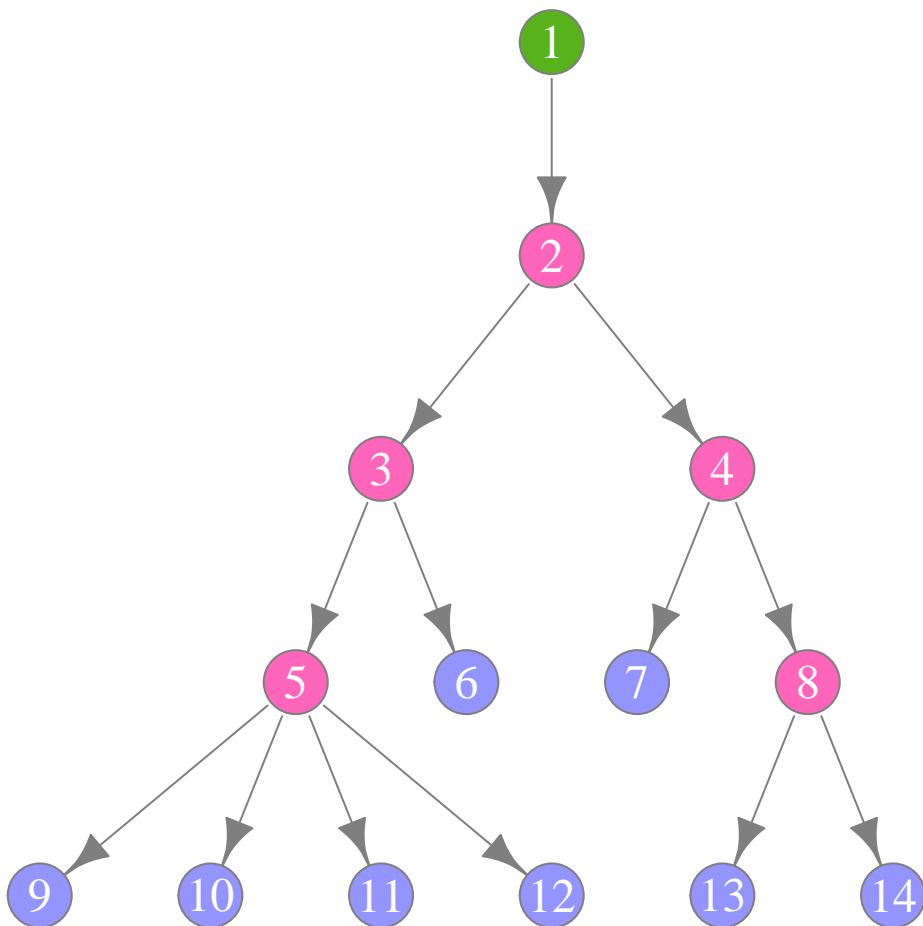

Supplement: Supplementary file 27 [file 11484059]

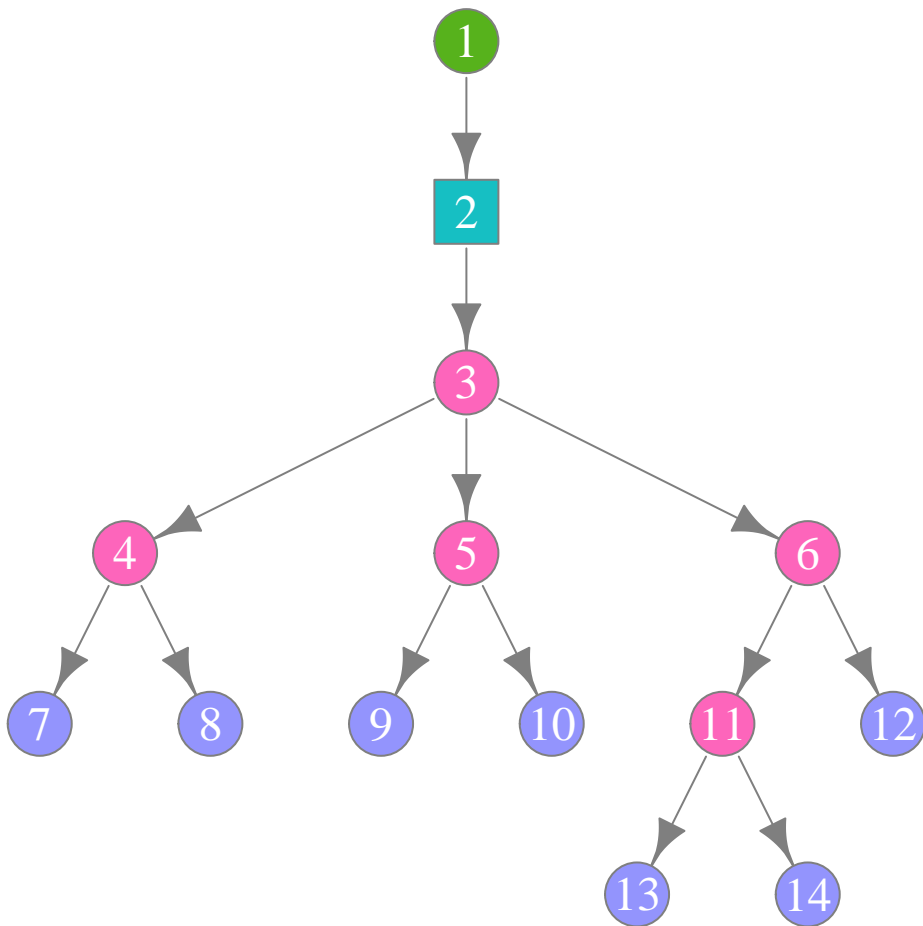

Supplement: Supplementary file 30 [file 11484059]

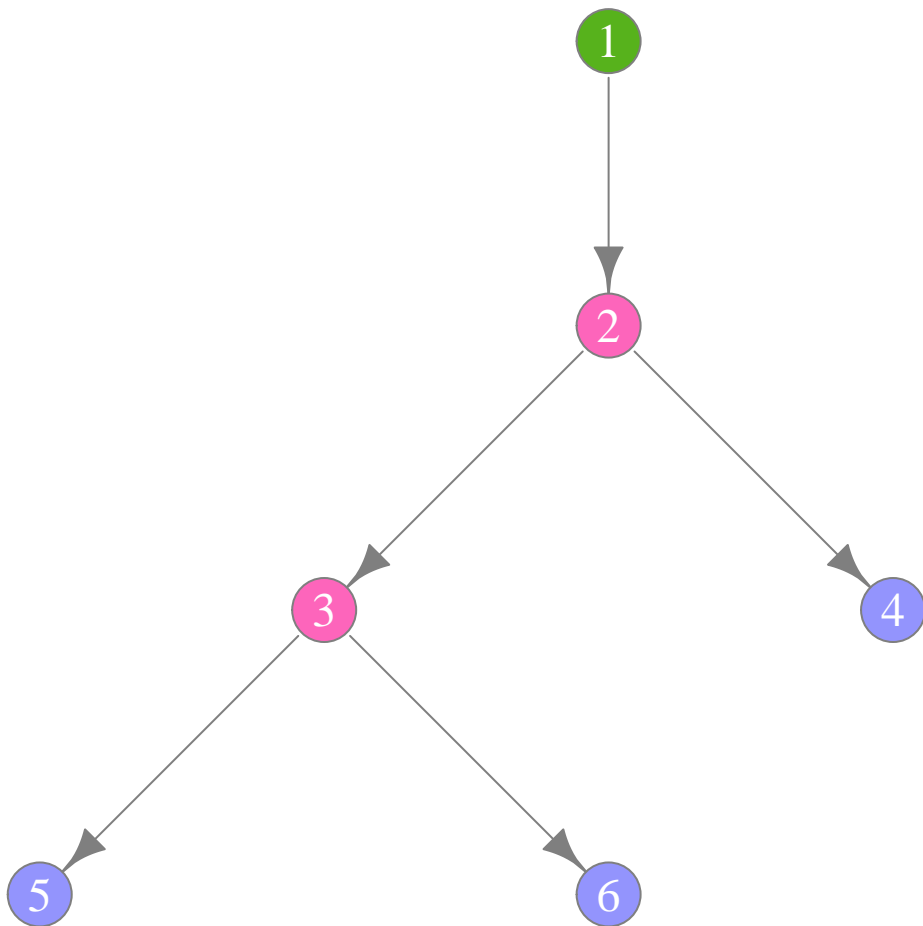

Supplement: Supplementary file 35 [file 11484059]

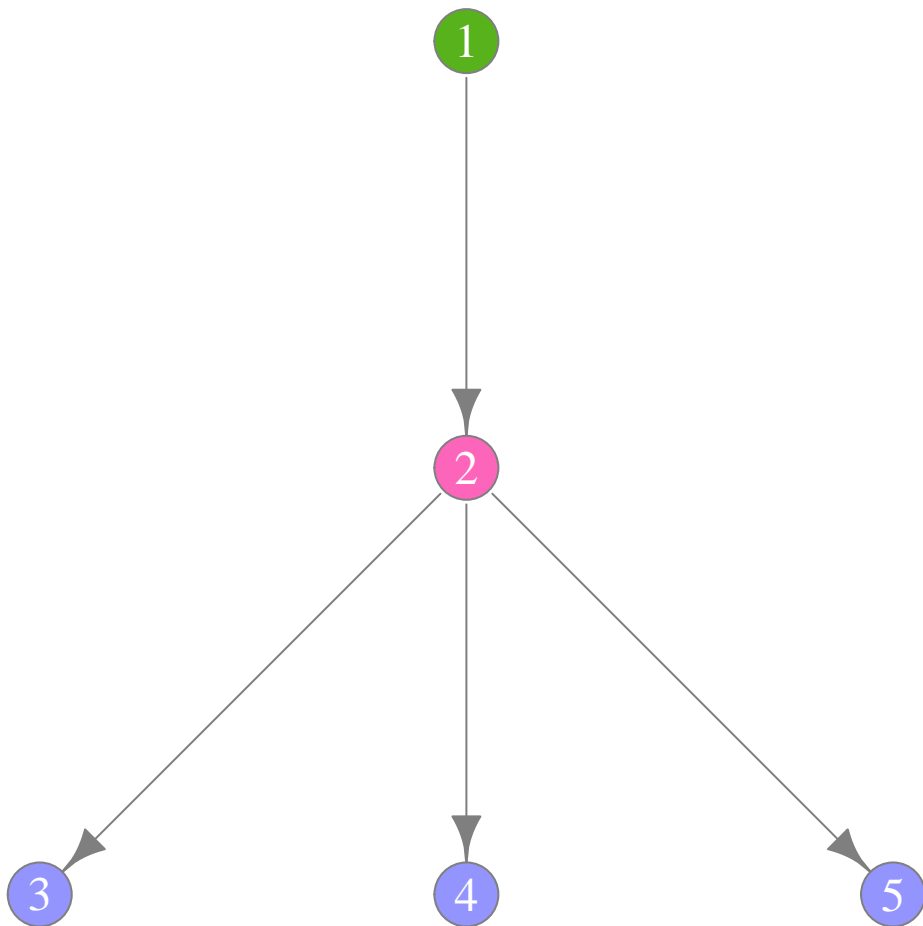

Supplement: Supplementary file 40 [file 11484059]

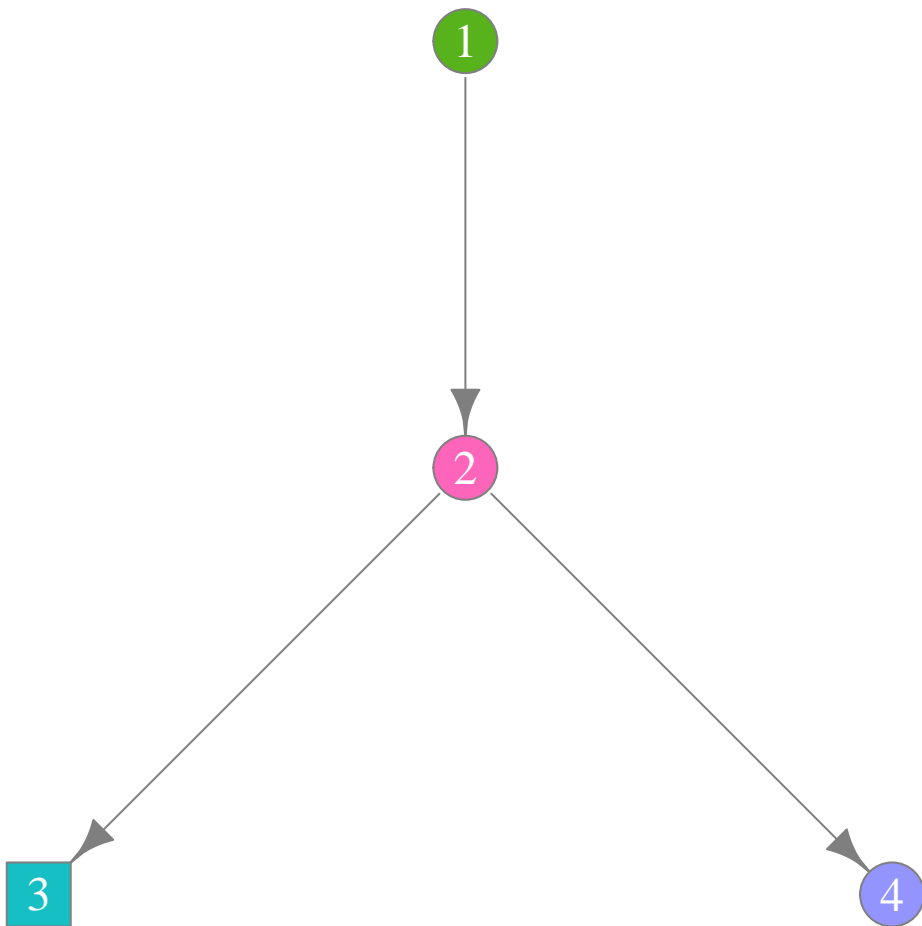

Supplement: Supplementary file 42 [file 11484059]

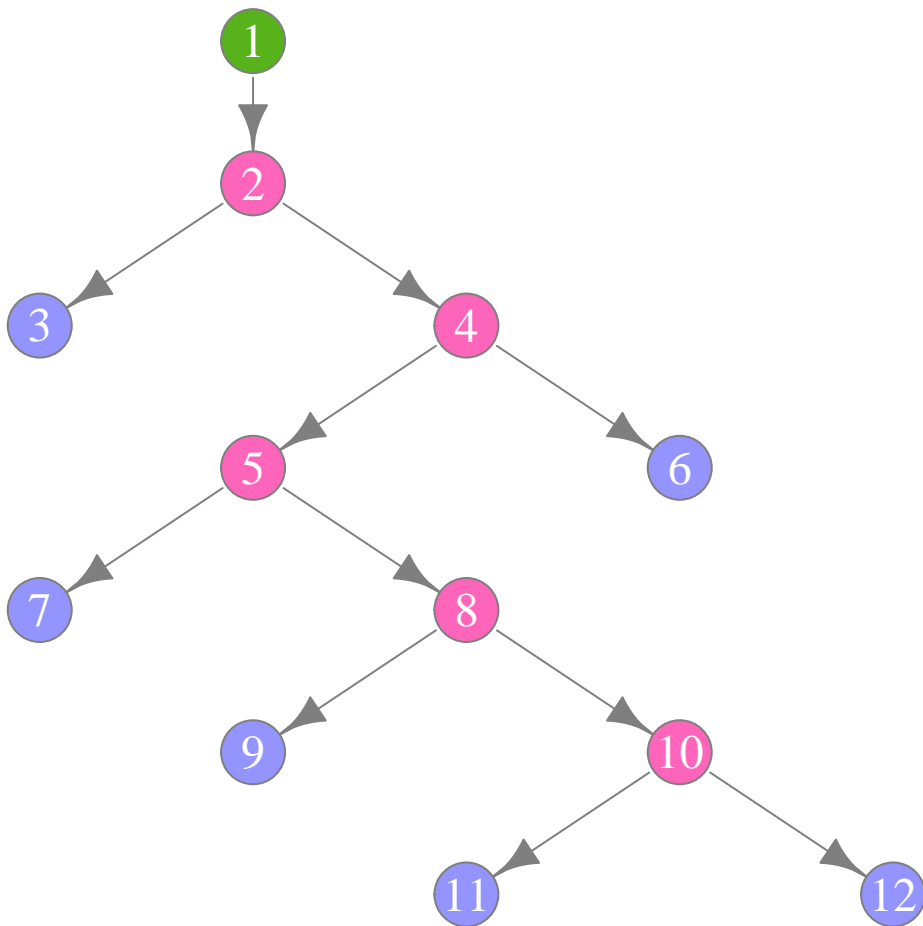

Supplement: Supplementary file 44 [file 11484059]

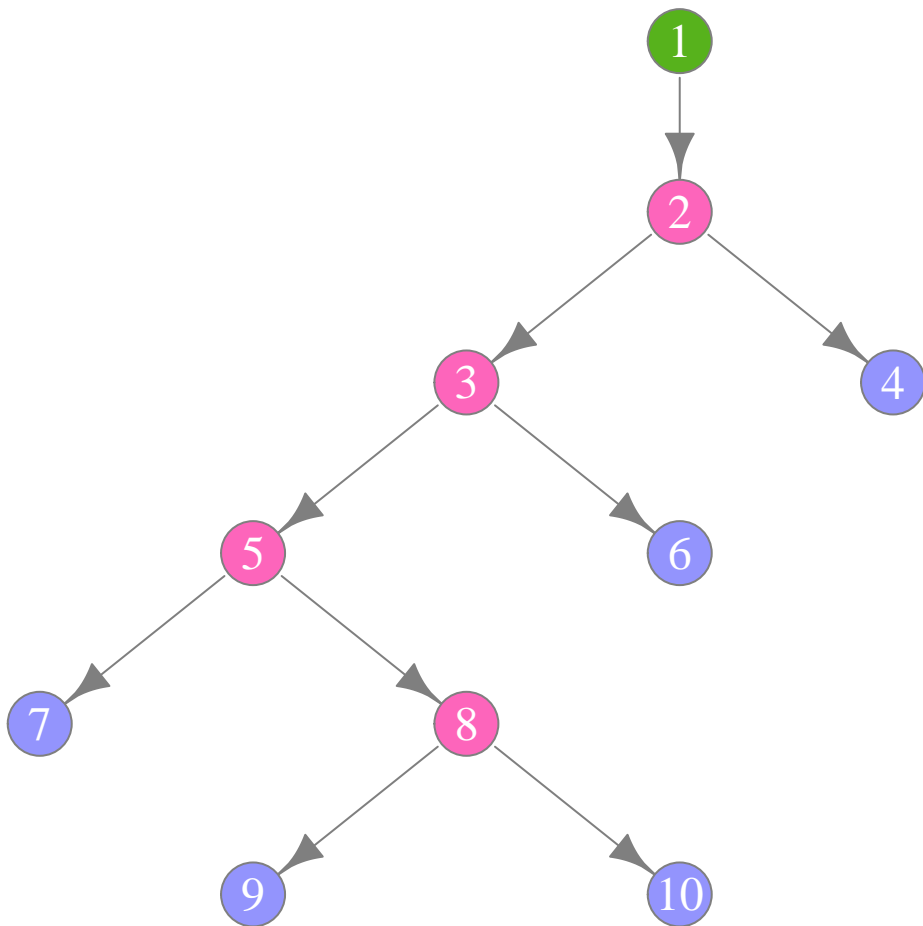

Supplement: Supplementary file 48 [file 11484059]

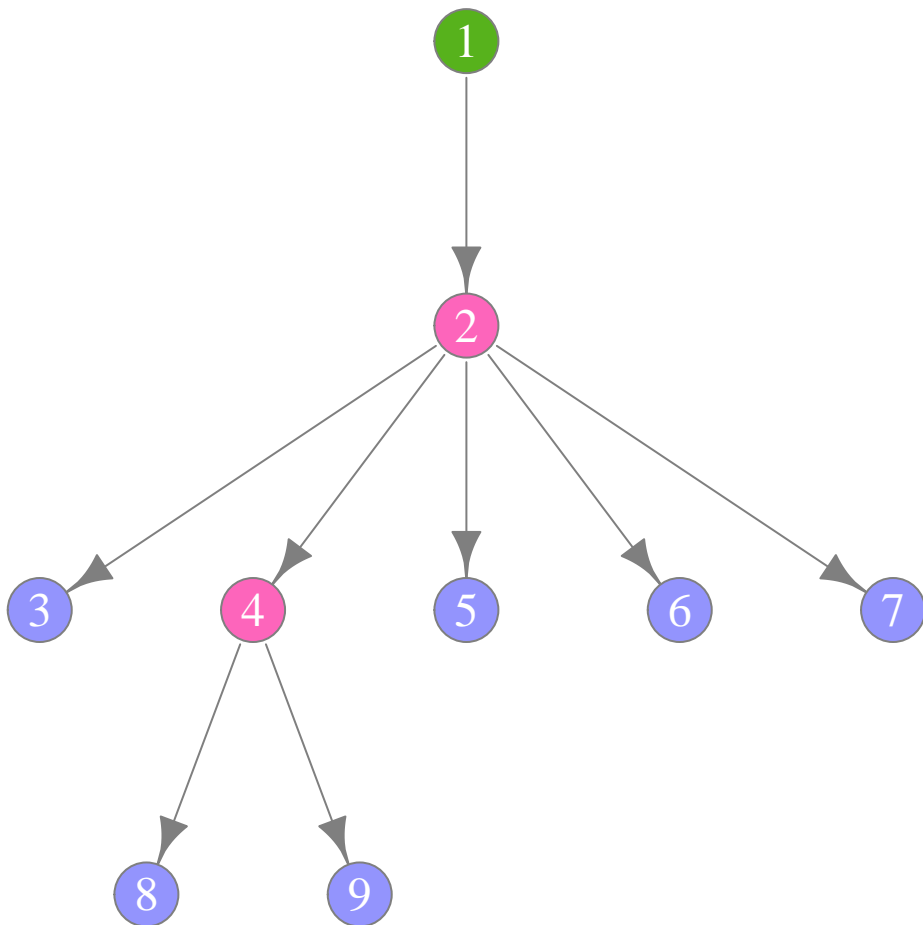

Supplement: Supplementary file 49 [file 11484059]

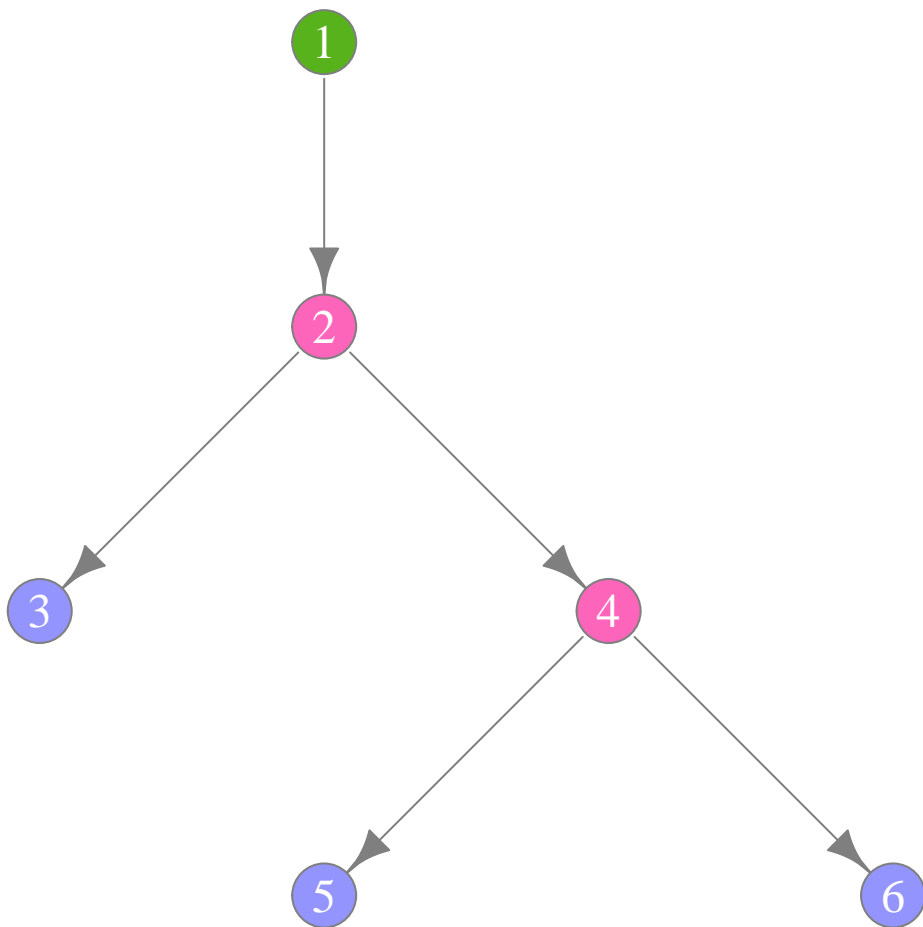

Supplement: Supplementary file 59 [file 11484059]

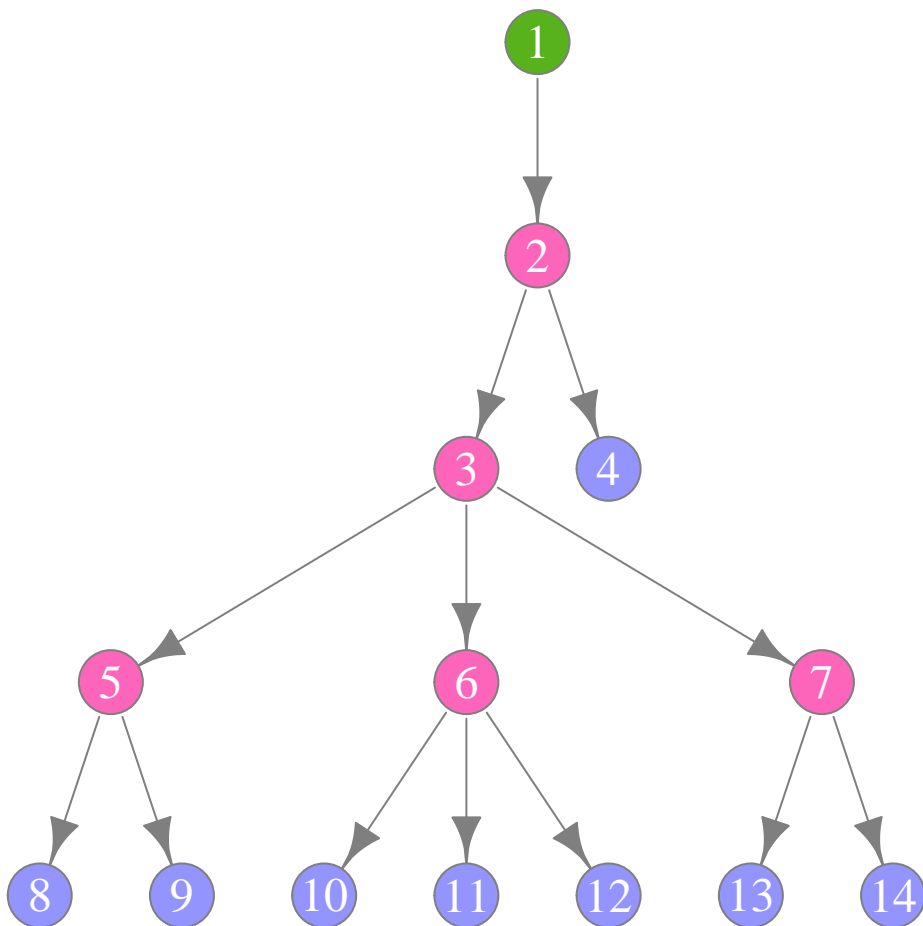

Supplement: Supplementary file 60 [file 11484059]

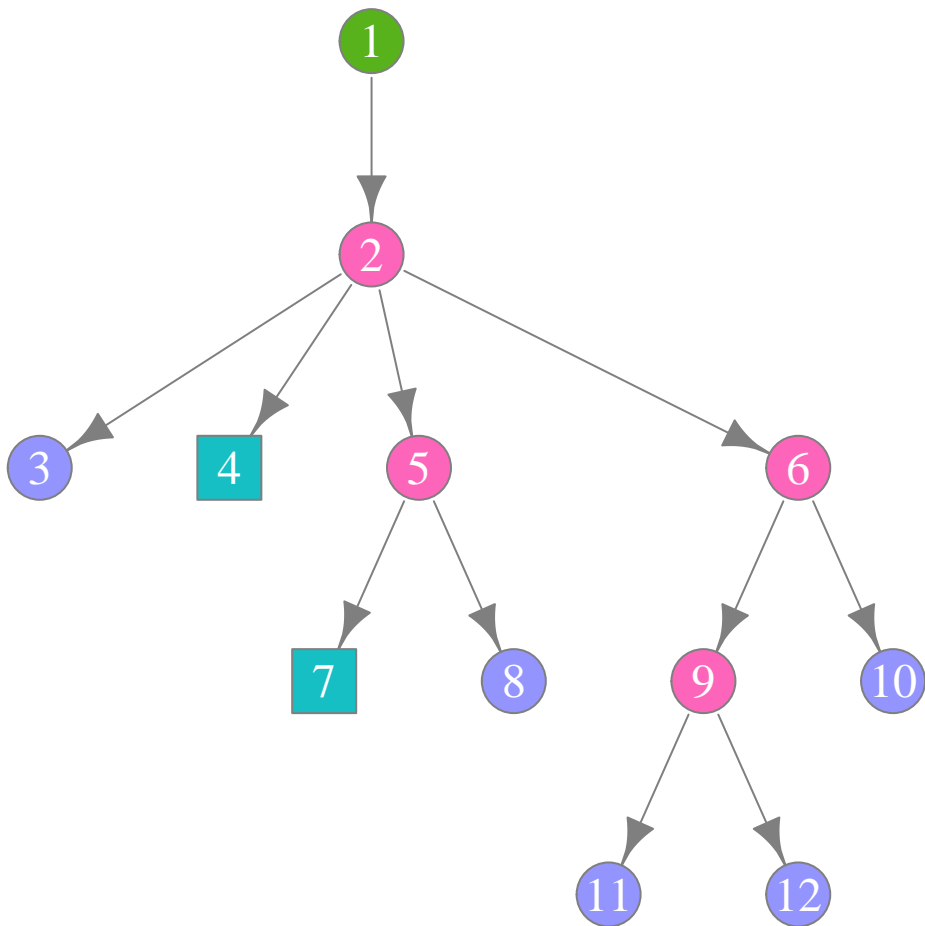

Supplement: Supplementary file 61 [file 11484059]
